# Supplementary material for: A Fast and Cost-Effective Genotyping Method for CRISPR-Cas9-Generated Mutant Rice Lines
Source: MDPI journal article supplement (doi:10.3390/plants12112189), 2023-05-31
Supplement: s1 [file s1]

**(a)**

gRNA1 target site

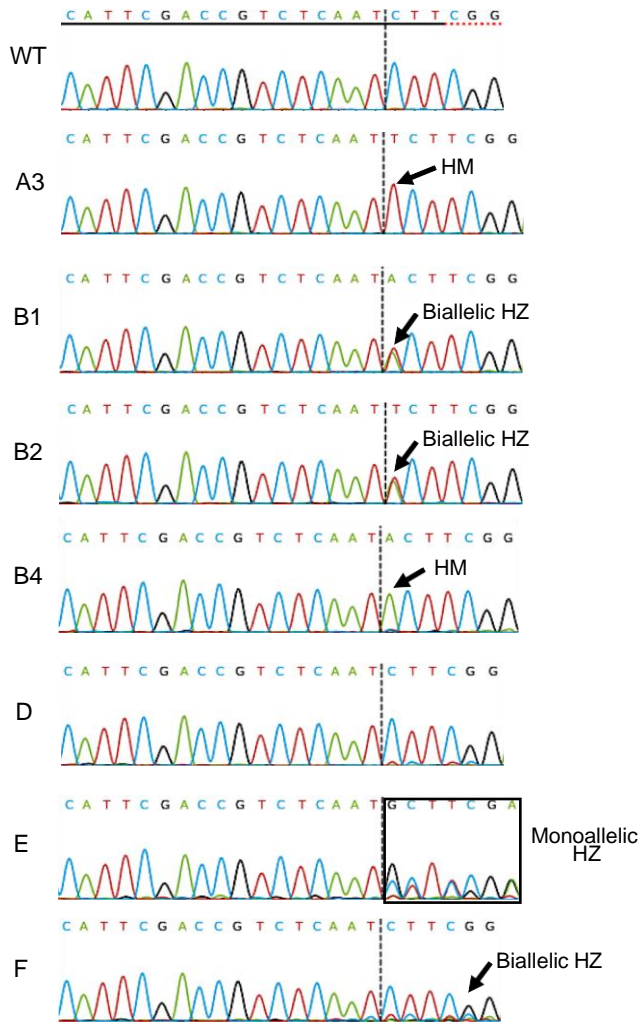**(b)**

gRNA2 target site

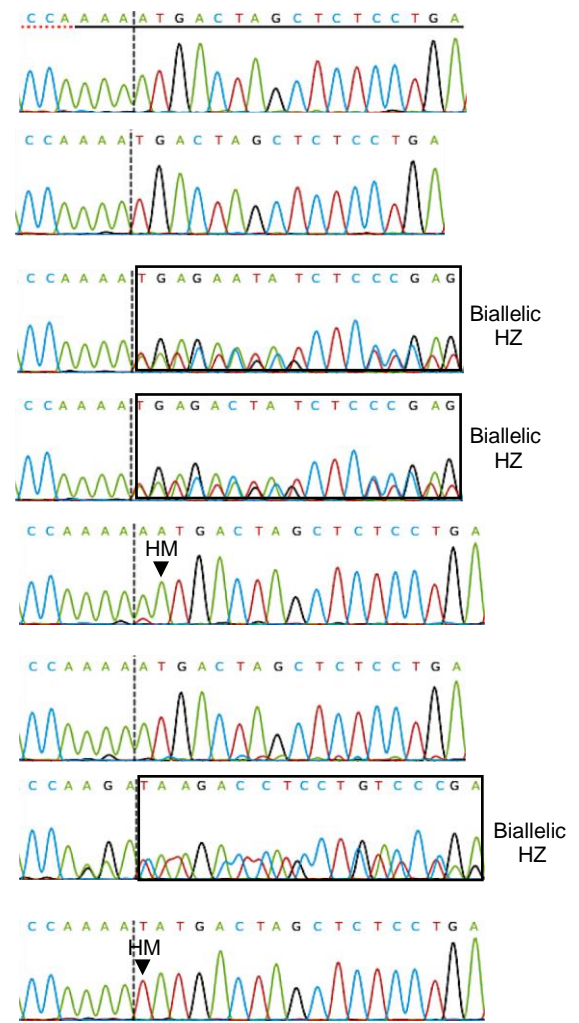

**Figure S1.** Chromatogram of sequenced direct PCR products. a) Detailed sequencing results around gRNA1 target site showing the original sequence (WT); homozygous insertion (A3, B3, B4); biallelic insertion (B1, B2, F); heterozygous insertion (E); and a regenerated plant without any mutation (D). b) Detailed sequencing results around gRNA2 target site showing the original sequence (WT); homozygous insertion (B4, F); biallelic insertion (A1, B1, B2, E); and a regenerated plant without any mutation (D).
