# Supplementary material for: A Fast and Cost-Effective Genotyping Method for CRISPR-Cas9-Generated Mutant Rice Lines
Source: MDPI journal article supplement (doi:10.3390/plants12112189), 2023-05-31
Supplement: s1 [file s1]

**Table S1.** Comparative analysis of different Plant Direct PCR kits in terms of cost, target amplifications and other parameters.

| Name of the Kits                      | Price                | Digestion buffer | PCR-ready mixture | Target amplif. size | DNA ladder for Gel run | Control primer |
|---------------------------------------|----------------------|------------------|-------------------|---------------------|------------------------|----------------|
| KAPA3G Plant PCR Kit                  | 467.95\$ per 250 rxn | No               | Yes               | up to 5 kb          | No                     | No             |
| Forgene Plant Leaf Direct PCRPlus Kit | N.D yet per 250 rxn  | Yes              | Yes               | up to 1 kb          | No                     | No             |
| Phire Plant Direct PCR Kit            | 110\$ per 250 rxn    | Yes              | Yes               | up to 3.5 kb        | Yes                    | Yes            |
